# Supplementary material
Source: publisher figshare collection journal article supplement (https://frontiersin.figshare.com/ndownloader/files/25307489)
Supplement: Supplementary file [file 25307489]

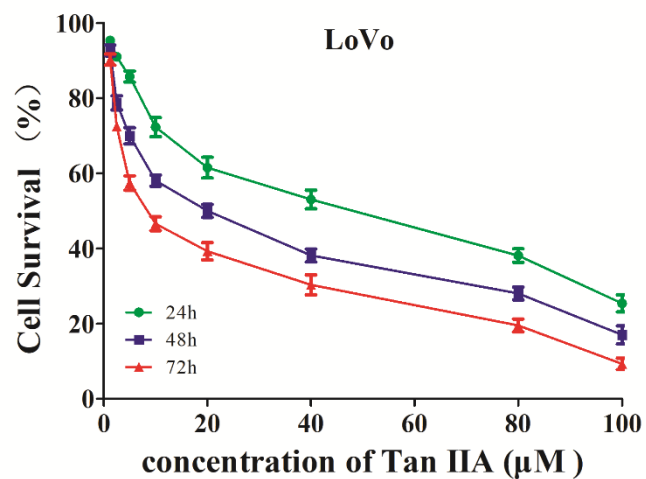

Supplementary Figure 1 Effect of f Tan IIA on the proliferation of LoVo cells. CCK-8 assay on the cellular inhibition of Tan IIA (0, 1.25, 2.5, 5, 10, 20, 40, 80, and 100  $\mu\text{M}$ ) in LoVo cells for 24, 48, and 72 h. The experiment was performed three times with similar results.
